# Supplementary material
Source: Springer Nature journal article supplement (https://www.springermedizin.de/resource/supplementary/12958_2009_503_MOESM1_ESM.pdf/9568162)

**A**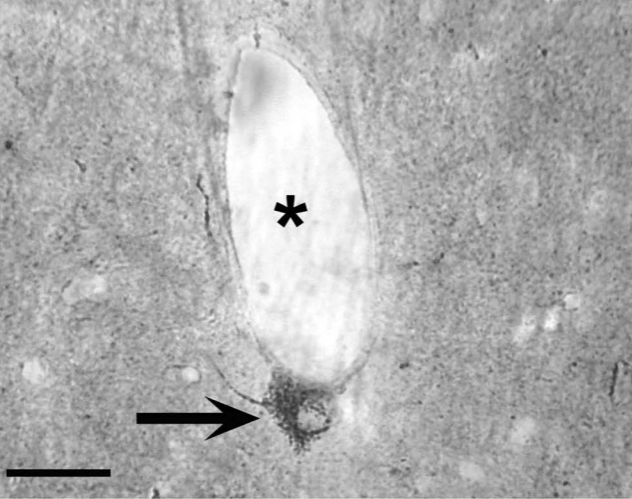**B**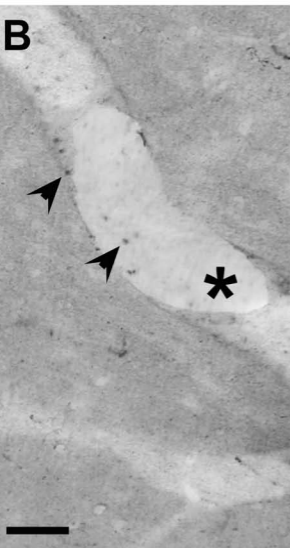**B1**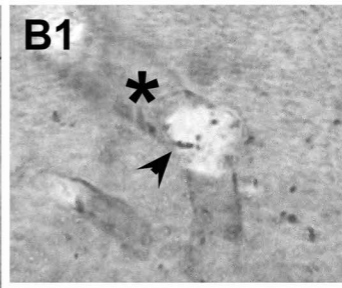

Supplement: MOESM1 [file 9568162]
